# Supplementary material for: Elucidating, understanding, and correlating the (photo)electrochemical and physicochemical properties of HKUST-1 through an experimental and computational approach
Source: Royal Society of Chemistry journal article supplement (doi:10.1039/d4nj01657b), 2024-01-01
Supplement: d4nj01657b1.pdf [file d4nj01657b1.pdf]

## Elucidating, understanding and correlating the photo-electrochemical properties of HKUST-1 through a computational and experimental approach.

| <b>Table S1.</b> Crystallite size determined for HKUST-1 synthesized in different works |                              |            |   |
|-----------------------------------------------------------------------------------------|------------------------------|------------|---|
| <b>Material</b>                                                                         | <b>Crystallite size (nm)</b> | <b>Ref</b> |   |
| HKUST-1 <sub>slow evaporation</sub>                                                     | 123                          | This work  |   |
| HKUST-1 <sub>5min</sub>                                                                 | 59                           | 1          |   |
| HKUST-1 <sub>10min</sub>                                                                | 51                           |            |   |
| HKUST-1 <sub>15min</sub>                                                                | 57                           |            |   |
| HKUST-1 <sub>20min</sub>                                                                | 60                           |            |   |
| Co-ferrite@HKUST-1                                                                      | 24                           |            | 2 |
| HKUST-1 <sub>MW</sub>                                                                   | 22.4                         | 3          |   |
| Ag <sub>3</sub> PO <sub>4</sub> /HKUST-1                                                | 20                           |            |   |
| Ag/Ag <sub>3</sub> PO <sub>4</sub> /HKUST-1                                             | 24.40                        |            |   |
| HKUST-1-0NH <sub>2</sub>                                                                | 36.7                         | 4          |   |
| HKUST-1-25NH <sub>2</sub>                                                               | 27.1                         |            |   |
| HKUST-1-50NH <sub>2</sub>                                                               | 32.5                         |            |   |
| HKUST-1-75NH <sub>2</sub>                                                               | 31.8                         |            |   |
| HKUST-1-100NH <sub>2</sub>                                                              | 20.7                         |            |   |
| HKUST-1-N1                                                                              | 58.3                         | 5          |   |
| HKUST-1-N2                                                                              | 51.9                         |            |   |
| HKUST-1-N3                                                                              | 41.7                         |            |   |
| HKUST-1-N4                                                                              | 49.3                         |            |   |
| HKUST-1-N5                                                                              | 51.8                         |            |   |
| HKUST-1-N6                                                                              | 70                           |            |   |
| HKUST-1-T1                                                                              | 80.9                         |            |   |
| HKUST-1-T1.5                                                                            | 60                           |            |   |
| HKUST-1-T2                                                                              | 78.6                         |            |   |
| HKUST-1-T3                                                                              | 68.5                         |            |   |
| HKUST-1-C0                                                                              | 47.5                         |            |   |
| HKUST-1-C1                                                                              | 42.4                         |            |   |
| HKUST-1-C1.5                                                                            | 42.1                         |            |   |
| HKUST-1-C3                                                                              | 57.4                         |            |   |
| HKUST-1-C4                                                                              | 57                           |            |   |
| HKUST-1 <sub>industrial production</sub>                                                | 87                           |            | 6 |
| HKUST-1 <sub>(C/route 20 h)</sub>                                                       | ~ 40                         |            | 7 |
| HKUST-1 <sub>(H/route 10 h)</sub>                                                       | ~ 85                         |            |   |
| HKUST-1 <sub>(H/route 20 h)</sub>                                                       | ~ 83                         |            |   |
| HKUST-1 <sub>(H/route 48 h)</sub>                                                       | ~ 44                         |            |   |
| HKUST-1 <sub>(H1)</sub>                                                                 | 52.9                         | 8          |   |
| H1/G_A                                                                                  | 45.1                         |            |   |

|                                                                        |       |    |
|------------------------------------------------------------------------|-------|----|
| H1/G_B                                                                 | 49.5  | 9  |
| H1/G(Cu)_A                                                             | 50.3  |    |
| H1/G(Cu)_B                                                             | 43.3  |    |
| MOF-199(HKUST-1)                                                       | 30.41 |    |
| MOF-199/ BaTi <sub>0.85</sub> Zr <sub>0.15</sub> O <sub>3</sub> ( 10%) | 38.63 |    |
| MOF-199/ BaTi <sub>0.85</sub> Zr <sub>0.15</sub> O <sub>3</sub> (20%)  | 41.76 |    |
| MOF-199/ BaTi <sub>0.85</sub> Zr <sub>0.1</sub> O <sub>3</sub> (30%)   | 40.07 |    |
| HKUST-1                                                                | 56.88 | 10 |
| BF-PS                                                                  | 34.29 |    |
| BF-OP <sub>O</sub>                                                     | 40.25 |    |
| BF-OP <sub>M</sub>                                                     | 49.34 |    |
| CV-PS                                                                  | 40.47 |    |
| CV-OP <sub>O</sub>                                                     | 44.38 |    |
| CV-OP <sub>M</sub>                                                     | 44.41 |    |
| EBT-PS                                                                 | 37.35 |    |
| EBT-OP <sub>O</sub>                                                    | 40.57 |    |
| EBT-OP <sub>M</sub>                                                    | 44.41 |    |

| Material                                   | Bandgap (eV) | Type of transition | Ref |
|--------------------------------------------|--------------|--------------------|-----|
| HKUST-1 <sub>slow evaporation</sub>        | 3.30         | Indirect           | 1   |
| HKUST-1 <sub>5min</sub>                    | 3.55         | Direct             |     |
| HKUST-1 <sub>10min</sub>                   | 3.42         |                    |     |
| HKUST-1 <sub>15min</sub>                   | 3.47         |                    |     |
| HKUST-1 <sub>20min</sub>                   | 3.45         |                    |     |
| HKUST-1 <sub>solvothermal</sub>            | 3.5          | Direct             | 11  |
| HKUST-1 <sub>solvothermal (1)</sub>        | 3.31         | Direct             | 12  |
| HKUST-1 <sub>solvothermal (2)</sub>        | 2.81         |                    | 13  |
| HKUST-1 <sub>DMF/EtOH</sub>                | 3            | -----              | 14  |
| HKUST-1 <sub>DMF/EtOH (Ce/Eu)</sub>        | 2.60         |                    |     |
| HKUST-1 <sub>ultrasoun-solvothermal</sub>  | 2.63         | Direct             | 15  |
| HKUST-1 <sub>MW</sub>                      | 3.15         | Direct             | 3   |
| HKUST-1 <sub>computational</sub>           | 2            | ----               | 16  |
| HKUST-1 <sub>solvothermal (3)</sub>        | 3.4          | Direct             | 17  |
| HKUST-1 <sub>solvothermal (H2O/EtOH)</sub> | 3.32         | Direct             | 18  |

**Table S3.** Mulliken charges and spin density calculated for HKUST-1. Here, minimum (min), averaged (aver), and maximum (max) charge values are reported.

| Compound | Elements | <i>s</i> | <i>p</i> | <i>d</i> | <i>f</i> | Total population | Charge ( <i>e</i> )                             | Spin density |
|----------|----------|----------|----------|----------|----------|------------------|-------------------------------------------------|--------------|
| HKUST-1  | Cu       | 6.403    | 12.339   | 9.305    | 0.00     | 28.047           | +0.953                                          | ±0.5         |
|          |          | 6.403    | 12.337   | 9.305    | 0.00     | 28.045           | (min)                                           |              |
|          |          | 6.403    | 12.337   | 9.302    | 0.00     | 28.042           | +0.955(aver)<br>+0.958<br>(max)                 |              |
|          | O        | 3.906    | 4.679    | 0.026    | 0.00     | 8.611            |                                                 | ±0.1         |
|          |          | 3.907    | 4.679    | 0.026    | 0.00     | 8.612            |                                                 |              |
|          |          | 3.907    | 4.679    | 0.027    | 0.00     | 8.613            | -0.611 (min)<br>-0.612(aver)<br>-0.613<br>(max) |              |
|          | C        | 3.181    | 2.873    | 0.035    | 0.00     | 6.089            |                                                 | 0.0          |
|          |          | 3.157    | 2.790    | 0.032    | 0.00     | 5.979            |                                                 |              |
|          |          | 2.975    | 2.199    | 0.116    | 0.00     | 5.290            | -0.089 (min)<br>0.021 (aver)<br>0.710 (max)     |              |

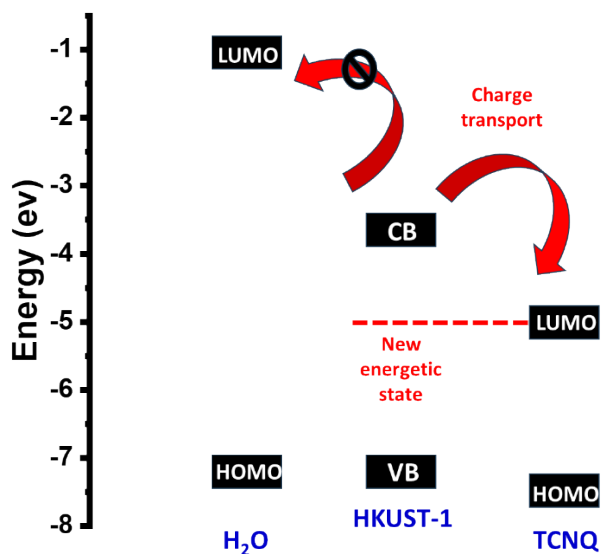

**Figure S1.** HOMO-LUMO energy of H<sub>2</sub>O<sup>19</sup>, VB and CB energy of HKUST-1, and HOMO-LUMO energy of TCNQ<sup>20, 21</sup>.

## References

1. E. M. C. Morales, M. A. Méndez-Rojas, L. M. Torres-Martínez, L. F. Garay-Rodríguez, I. López, I. E. Uflyand and B. I. Kharisov, *Polyhedron*, 2021, **210**, 115517.
2. T. Saemian, M. Gharagozlou, M. Hossaini Sadr and S. Naghibi, *J. Inorg. Organomet. Polym. Mater.*, 2020, **30**, 2347-2355.
3. F. A. Sofi, K. Majid and O. Mehraj, *J. Alloys Compd.*, 2018, **737**, 798-808.
4. C. Y. Chuah, W. Li, S. A. S. C. Samarasinghe, G. S. M. D. P. Sethunga and T.-H. Bae, *Microporous Mesoporous Mater.*, 2019, **290**, 109680.
5. C. Xin, H. Zhan, X. Huang, H. Li, N. Zhao, F. Xiao, W. Wei and Y. Sun, *RSC Adv.*, 2015, **5**, 27901-27911.
6. J. Huo, M. Brightwell, S. El Hankari, A. Garai and D. Bradshaw, *J. Mater. Chem.*, 2013, **1**, 15220-15223.
7. S. Gautam, J. Singhal, H. K. Lee and K. H. Chae, *Mater. Today Chem.*, 2022, **23**, 100647.
8. P. Jagódka, K. Matus and A. Łamacz, *Molecules*, 2022, **27**, 7082.
9. R. Sheikhsamany, H. Faghihian and R. Fazaeli, *Inorg. Chem. Commun.*, 2021, **134**, 109048.
10. S. Loera-Serna, E. Ortiz and H. I. Beltrán, *New J Chem*, 2017, **41**, 3097-3105.
11. S. Jalali, M. R. Rahimi, K. Dashtian, M. Ghaedi and S. Mosleh, *Polyhedron*, 2019, **166**, 217-225.
12. J. Zhang, C. Su, X. Xie, P. Liu and M. E. Huq, *RSC Adv.*, 2020, **10**, 37028-37034.
13. D. Zheng, M. Chen, J. Peng, J. Chen, T. Chen, Y. Chen, L. Huang and W. Gao, *Microchim. Acta.*, 2021, **188**, 328.
14. S. Mosleh, K. Rezaei, K. Dashtian and Z. Salehi, *J. Hazard. Mater.*, 2021, **409**, 124478.
15. S. Mosleh, M. R. Rahimi, M. Ghaedi and K. Dashtian, *Ultrason. Sonochem.*, 2016, **32**, 387-397.
16. Z.-G. Gu, L. Heinke, C. Wöll, T. Neumann, W. Wenzel, Q. Li, K. Fink, O. D. Gordan and D. R. T. Zahn, *Applied Physics Letters*, 2015, **107**, 183301.
17. M. Karimi, S. Sadeghi, H. Mohebbali, Z. Azarkhosh, V. Safarifard, A. R. Mahjoub and A. Heydari, *New J Chem*, 2021.
18. O. Mehraj, F. A. Sofi, S. K. Moosvi, W. Naqash and K. Majid, *J. Mater. Sci.: Mater. Electron.*, 2018, **29**, 3358-3369.
19. S. ten Brinck, C. Nieuwland, A. van der Werf, R. M. P. Veenboer, H. Linnartz, F. M. Bickelhaupt and C. Fonseca Guerra, *ACS Earth Space Chem.*, 2022, **6**, 766-774.
20. M. E. Sánchez Vergara, L. Ramírez Vargas, C. Rios, B. Molina and R. Salcedo, *Electronics*, 2021, **10**, 117.
21. J. E. Rainbolt, A. B. Padmaperuma, N. Govind and D. J. Gaspar, *Mol. Simul.*, 2013, **39**, 350-356.
